# Supplementary material
Source: ML conference proceedings conference paper supplement (https://proceedings.mlr.press/v70/liu17e.html)
Supplement: Supplementary file [file liu17e-supp.pdf]

---

# Dual Iterative Hard Thresholding: From Non-convex Sparse Minimization to Non-smooth Concave Maximization

## Supplementary File

---

### A. Technical Proofs

#### A.1. Proof of Theorem 1

*Proof.* “ $\Leftarrow$ ”: If the pair  $(\bar{w}, \bar{\alpha})$  is a sparse saddle point for  $L$ , then from the definition of conjugate convexity and inequality (3) we have

$$P(\bar{w}) = \max_{\alpha \in \mathcal{F}^N} L(\bar{w}, \alpha) \leq L(\bar{w}, \bar{\alpha}) \leq \min_{\|w\|_0 \leq k} L(w, \bar{\alpha}).$$

On the other hand, we know that for any  $\|w\|_0 \leq k$  and  $\alpha \in \mathcal{F}^N$

$$L(w, \alpha) \leq \max_{\alpha' \in \mathcal{F}^N} L(w, \alpha') = P(w).$$

By combining the preceding two inequalities we obtain

$$P(\bar{w}) \leq \min_{\|w\|_0 \leq k} L(w, \bar{\alpha}) \leq \min_{\|w\|_0 \leq k} P(w) \leq P(\bar{w}).$$

Therefore  $P(\bar{w}) = \min_{\|w\|_0 \leq k} P(w)$ , i.e.,  $\bar{w}$  solves the problem in (1), which proves the necessary condition (a). Moreover, the above arguments lead to

$$P(\bar{w}) = \max_{\alpha \in \mathcal{F}^N} L(\bar{w}, \alpha) = L(\bar{w}, \bar{\alpha}).$$

Then from the maximizing argument property of convex conjugate we know that  $\bar{\alpha}_i \in \partial l_i(\bar{w}^\top x_i)$ . Thus the necessary condition (b) holds. Note that

$$L(w, \bar{\alpha}) = \frac{\lambda}{2} \left\| w + \frac{1}{N\lambda} \sum_{i=1}^N \bar{\alpha}_i x_i \right\|^2 - \frac{1}{N} \sum_{i=1}^N l_i^*(\bar{\alpha}_i) + C, \quad (11)$$

where  $C$  is a quantity not dependent on  $w$ . Let  $\bar{F} = \text{supp}(\bar{w})$ . Since the above analysis implies  $L(\bar{w}, \bar{\alpha}) = \min_{\|w\|_0 \leq k} L(w, \bar{\alpha})$ , it must hold that

$$\bar{w} = \text{H}_{\bar{F}} \left( -\frac{1}{N\lambda} \sum_{i=1}^N \bar{\alpha}_i x_i \right) = \text{H}_k \left( -\frac{1}{N\lambda} \sum_{i=1}^N \bar{\alpha}_i x_i \right).$$

This validates the necessary condition (c).

“ $\Rightarrow$ ”: Conversely, let us assume that  $\bar{w}$  is a  $k$ -sparse solution to the problem (1) (i.e., condition(a)) and let  $\bar{\alpha}_i \in \partial l_i(\bar{w}^\top x_i)$  (i.e., condition (b)). Again from the maximizing argument property of convex conjugate we know that  $l_i(\bar{w}^\top x_i) = \bar{\alpha}_i \bar{w}^\top x_i - l_i^*(\bar{\alpha}_i)$ . This leads to

$$L(\bar{w}, \alpha) \leq P(\bar{w}) = \max_{\alpha \in \mathcal{F}^N} L(\bar{w}, \alpha) = L(\bar{w}, \bar{\alpha}). \quad (12)$$

The sufficient condition (c) guarantees that  $\bar{F}$  contains the top  $k$  (in absolute value) entries of  $-\frac{1}{N\lambda} \sum_{i=1}^N \bar{\alpha}_i x_i$ . Then based on the expression in (11) we can see that the following holds for any  $k$ -sparse vector  $w$

$$L(\bar{w}, \bar{\alpha}) \leq L(w, \bar{\alpha}). \quad (13)$$

By combining the inequalities (12) and (13) we get that for any  $\|w\|_0 \leq k$  and  $\alpha \in \mathcal{F}^N$ ,

$$L(\bar{w}, \alpha) \leq L(\bar{w}, \bar{\alpha}) \leq L(w, \bar{\alpha}).$$

This shows that  $(\bar{w}, \bar{\alpha})$  is a sparse saddle point of the Lagrangian  $L$ . □

## A.2. Proof of Theorem 2

*Proof.* “ $\Rightarrow$ ”: Let  $(\bar{w}, \bar{\alpha})$  be a saddle point for  $L$ . On one hand, note that the following holds for any  $k$ -sparse  $w'$  and  $\alpha' \in \mathcal{F}^N$

$$\min_{\|w\|_0 \leq k} L(w, \alpha') \leq L(w', \alpha') \leq \max_{\alpha \in \mathcal{F}^N} L(w', \alpha),$$

which implies

$$\max_{\alpha \in \mathcal{F}^N} \min_{\|w\|_0 \leq k} L(w, \alpha) \leq \min_{\|w\|_0 \leq k} \max_{\alpha \in \mathcal{F}^N} L(w, \alpha). \quad (14)$$

On the other hand, since  $(\bar{w}, \bar{\alpha})$  is a saddle point for  $L$ , the following is true:

$$\begin{aligned} \min_{\|w\|_0 \leq k} \max_{\alpha \in \mathcal{F}^N} L(w, \alpha) &\leq \max_{\alpha \in \mathcal{F}^N} L(\bar{w}, \alpha) \\ &\leq L(\bar{w}, \bar{\alpha}) \leq \min_{\|w\|_0 \leq k} L(w, \bar{\alpha}) \\ &\leq \max_{\alpha \in \mathcal{F}^N} \min_{\|w\|_0 \leq k} L(w, \alpha). \end{aligned} \quad (15)$$

By combining (14) and (15) we prove the equality in (4).

“ $\Leftarrow$ ”: Assume that the equality in (4) holds. Let us define  $\bar{w}$  and  $\bar{\alpha}$  such that

$$\begin{aligned} \max_{\alpha \in \mathcal{F}^N} L(\bar{w}, \alpha) &= \min_{\|w\|_0 \leq k} \max_{\alpha \in \mathcal{F}^N} L(w, \alpha) \\ \min_{\|w\|_0 \leq k} L(w, \bar{\alpha}) &= \max_{\alpha \in \mathcal{F}^N} \min_{\|w\|_0 \leq k} L(w, \alpha). \end{aligned}$$

Then we can see that for any  $\alpha \in \mathcal{F}^N$ ,

$$L(\bar{w}, \bar{\alpha}) \geq \min_{\|w\|_0 \leq k} L(w, \bar{\alpha}) = \max_{\alpha' \in \mathcal{F}^N} L(\bar{w}, \alpha') \geq L(\bar{w}, \alpha),$$

where the “=” is due to (4). In the meantime, for any  $\|w\|_0 \leq k$ ,

$$L(\bar{w}, \bar{\alpha}) \leq \max_{\alpha \in \mathcal{F}^N} L(\bar{w}, \alpha) = \min_{\|w'\|_0 \leq k} L(w', \bar{\alpha}) \leq L(w, \bar{\alpha}).$$

This shows that  $(\bar{w}, \bar{\alpha})$  is a sparse saddle point for  $L$ . □

## A.3. Proof of Lemma 1

*Proof.* For any fixed  $\alpha \in \mathcal{F}^N$ , then it is easy to verify that the  $k$ -sparse minimum of  $L(w, \alpha)$  with respect to  $w$  is attained at the following point:

$$w(\alpha) = \arg \min_{\|w\|_0 \leq k} L(w, \alpha) = \text{H}_k \left( -\frac{1}{N\lambda} \sum_{i=1}^N \alpha_i x_i \right).$$

Thus we have

$$\begin{aligned} D(\alpha) &= \min_{\|w\|_0 \leq k} L(w, \alpha) = L(w(\alpha), \alpha) \\ &= \frac{1}{N} \sum_{i=1}^N (\alpha_i w(\alpha)^\top x_i - l_i^*(\alpha_i)) + \frac{\lambda}{2} \|w(\alpha)\|^2 \\ &\stackrel{\zeta_1}{=} \frac{1}{N} \sum_{i=1}^N -l_i^*(\alpha_i) - \frac{\lambda}{2} \|w(\alpha)\|^2, \end{aligned}$$

where “ $\zeta_1$ ” follows from the above definition of  $w(\alpha)$ .

Now let us consider two arbitrary dual variables  $\alpha', \alpha'' \in \mathcal{F}^N$  and any  $g(\alpha'') \in \frac{1}{N} [w(\alpha'')^\top x_1 - \partial l_1^*(\alpha''_1), \dots, w(\alpha'')^\top x_N - \partial l_N^*(\alpha''_N)]$ . From the definition of  $D(\alpha)$  and the fact that  $L(w, \alpha)$  is concave with respect to  $\alpha$  at any fixed  $w$  we can derive that

$$\begin{aligned} D(\alpha') &= L(w(\alpha'), \alpha') \\ &\leq L(w(\alpha''), \alpha') \\ &\leq L(w(\alpha''), \alpha'') + \langle g(\alpha''), \alpha' - \alpha'' \rangle. \end{aligned}$$

This shows that  $D(\alpha)$  is a concave function and its super-differential is as given in the theorem.

If we further assume that  $w(\alpha)$  is unique and  $\{l_i^*\}_{i=1,\dots,N}$  are differentiable at any  $\alpha$ , then  $\partial D(\alpha) = \frac{1}{N}[w(\alpha)^\top x_1 - \partial l_1^*(\alpha_1), \dots, w(\alpha)^\top x_N - \partial l_N^*(\alpha_N)]$  becomes unique, which implies that  $\partial D(\alpha)$  is the unique super-gradient of  $D(\alpha)$ .  $\square$

#### A.4. Proof of Theorem 3

*Proof.* “ $\Rightarrow$ ”: Given the conditions in the theorem, it can be known from Theorem 1 that the pair  $(\bar{w}, \bar{\alpha})$  forms a sparse saddle point of  $L$ . Thus based on the definitions of sparse saddle point and dual function  $D(\alpha)$  we can show that

$$D(\bar{\alpha}) = \min_{\|w\|_0 \leq k} L(w, \bar{\alpha}) \geq L(\bar{w}, \bar{\alpha}) \geq L(\bar{w}, \alpha) \geq D(\alpha).$$

This implies that  $\bar{\alpha}$  solves the dual problem in (5). Furthermore, Theorem 2 guarantees the following

$$D(\bar{\alpha}) = \max_{\alpha \in \mathcal{F}^N} \min_{\|w\|_0 \leq k} L(w, \alpha) = \min_{\|w\|_0 \leq k} \max_{\alpha \in \mathcal{F}^N} L(w, \alpha) = P(\bar{w}).$$

This indicates that the primal and dual optimal values are equal to each other.

“ $\Leftarrow$ ”: Assume that  $\bar{\alpha}$  solves the dual problem in (5) and  $D(\bar{\alpha}) = P(\bar{w})$ . Since  $D(\bar{\alpha}) \leq P(w)$  holds for any  $\|w\|_0 \leq k$ ,  $\bar{w}$  must be the sparse minimizer of  $P(w)$ . It follows that

$$\max_{\alpha \in \mathcal{F}^N} \min_{\|w\|_0 \leq k} L(w, \alpha) = D(\bar{\alpha}) = P(\bar{w}) = \min_{\|w\|_0 \leq k} \max_{\alpha \in \mathcal{F}^N} L(w, \alpha).$$

From the “ $\Leftarrow$ ” argument in the proof of Theorem 2 and Corollary 1 we get that the conditions (a)~(c) in Theorem 1 should be satisfied for  $(\bar{w}, \bar{\alpha})$ .  $\square$

#### A.5. Proof of Theorem 4

We need a series of technical lemmas to prove this theorem. The following lemmas shows that under proper conditions,  $w(\alpha)$  is locally smooth around  $\bar{w} = w(\bar{\alpha})$ .

**Lemma 2.** Let  $X = [x_1, \dots, x_N] \in \mathbb{R}^{d \times N}$  be the data matrix. Assume that  $\{l_i\}_{i=1,\dots,N}$  are differentiable and

$$\bar{\epsilon} := \bar{w}_{\min} - \frac{1}{\lambda} \|P'(\bar{w})\|_\infty > 0.$$

If  $\|\alpha - \bar{\alpha}\| \leq \frac{\lambda N \bar{\epsilon}}{2\sigma_{\max}(X)}$ , then  $\text{supp}(w(\alpha)) = \text{supp}(\bar{w})$  and

$$\|w(\alpha) - \bar{w}\| \leq \frac{\sigma_{\max}(X, k)}{N\lambda} \|\alpha - \bar{\alpha}\|.$$

*Proof.* For any  $\alpha \in \mathcal{F}^N$ , let us define

$$\tilde{w}(\alpha) = -\frac{1}{N\lambda} \sum_{i=1}^N \alpha_i x_i.$$

Consider  $\bar{F} = \text{supp}(\bar{w})$ . Given  $\bar{\epsilon} > 0$ , it is known from Theorem 3 that  $\bar{w} = \mathbf{H}_{\bar{F}}(\tilde{w}(\bar{\alpha}))$  and  $\frac{P'(\bar{w})}{\lambda} = \mathbf{H}_{\bar{F}^c}(-\tilde{w}(\bar{\alpha}))$ . Then  $\bar{\epsilon} > 0$  implies  $\bar{F}$  is unique, i.e., the top  $k$  entries of  $\tilde{w}(\bar{\alpha})$  is unique. Given that  $\|\alpha - \bar{\alpha}\| \leq \frac{\lambda N \bar{\epsilon}}{2\sigma_{\max}(X)}$ , it can be shown that

$$\|\tilde{w}(\alpha) - \tilde{w}(\bar{\alpha})\| = \frac{1}{N\lambda} \|X(\alpha - \bar{\alpha})\| \leq \frac{\sigma_{\max}(X)}{N\lambda} \|\alpha - \bar{\alpha}\| \leq \frac{\bar{\epsilon}}{2}.$$

This indicates that  $\bar{F}$  still contains the (unique) top  $k$  entries of  $\tilde{w}(\alpha)$ . Therefore,

$$\text{supp}(w(\alpha)) = \bar{F} = \text{supp}(\bar{w}).$$

Then it must hold that

$$\begin{aligned} \|w(\alpha) - w(\bar{\alpha})\| &= \|\mathbf{H}_{\bar{F}}(\tilde{w}(\alpha)) - \mathbf{H}_{\bar{F}}(\tilde{w}(\bar{\alpha}))\| \\ &= \frac{1}{N\lambda} \|X_{\bar{F}}(\alpha - \bar{\alpha})\| \\ &\leq \frac{\sigma_{\max}(X, k)}{N\lambda} \|\alpha - \bar{\alpha}\|. \end{aligned}$$

This proves the desired bound.  $\square$

The following lemma bounds the estimation error  $\|\alpha - \bar{\alpha}\| = O(\sqrt{\langle D'(\alpha), \bar{\alpha} - \alpha \rangle})$  when the primal loss  $\{l_i\}_{i=1}^N$  are smooth.

**Lemma 3.** Assume that the primal loss functions  $\{l_i(\cdot)\}_{i=1}^N$  are  $1/\mu$ -smooth. Then the following inequality holds for any  $\alpha, \alpha'' \in \mathcal{F}$  and  $g(\alpha'') \in \partial D(\alpha'')$ :

$$D(\alpha') \leq D(\alpha'') + \langle g(\alpha''), \alpha' - \alpha'' \rangle - \frac{\lambda N \mu + \sigma_{\min}^2(X, k)}{2\lambda N^2} \|\alpha' - \alpha''\|^2.$$

Moreover,  $\forall \alpha \in \mathcal{F}$  and  $g(\alpha) \in \partial D(\alpha)$ ,

$$\|\alpha - \bar{\alpha}\| \leq \sqrt{\frac{2\lambda N^2 \langle g(\alpha), \bar{\alpha} - \alpha \rangle}{\lambda N \mu + \sigma_{\min}^2(X, k)}}.$$

*Proof.* Recall that

$$D(\alpha) = \frac{1}{N} \sum_{i=1}^N -l_i^*(\alpha_i) - \frac{\lambda}{2} \|w(\alpha)\|^2,$$

Now let us consider two arbitrary dual variables  $\alpha', \alpha'' \in \mathcal{F}$ . The assumption of  $l_i$  being  $1/\mu$ -smooth implies that its convex conjugate function  $l_i^*$  is  $\mu$ -strongly-convex. Let  $F'' = \text{supp}(w(\alpha''))$ . Then

$$\begin{aligned} D(\alpha') &= \frac{1}{N} \sum_{i=1}^N -l_i^*(\alpha'_i) - \frac{\lambda}{2} \|w(\alpha')\|^2 \\ &= \frac{1}{N} \sum_{i=1}^N -l_i^*(\alpha'_i) - \frac{\lambda}{2} \left\| \mathbf{H}_k \left( -\frac{1}{N\lambda} \sum_{i=1}^N \alpha'_i x_i \right) \right\|^2 \\ &\leq \frac{1}{N} \sum_{i=1}^N \left( -l_i^*(\alpha''_i) - l_i^*(\alpha''_i)(\alpha'_i - \alpha''_i) - \frac{\mu}{2} (\alpha'_i - \alpha''_i)^2 \right) - \frac{\lambda}{2} \left\| \mathbf{H}_{F''} \left( -\frac{1}{N\lambda} \sum_{i=1}^N \alpha'_i x_i \right) \right\|^2 \\ &\leq \frac{1}{N} \sum_{i=1}^N \left( -l_i^*(\alpha''_i) - l_i^*(\alpha''_i)(\alpha'_i - \alpha''_i) - \frac{\mu}{2} (\alpha'_i - \alpha''_i)^2 \right) - \frac{\lambda}{2} \|w(\alpha'')\|^2 + \frac{1}{N} \sum_{i=1}^N x_i^\top w(\alpha'') (\alpha'_i - \alpha''_i) \\ &\quad - \frac{1}{2\lambda N^2} (\alpha' - \alpha'')^\top X_{F''}^\top X_{F''} (\alpha' - \alpha'') \\ &\leq D(\alpha'') + \langle g(\alpha''), \alpha' - \alpha'' \rangle - \frac{\lambda N \mu + \sigma_{\min}^2(X, k)}{2\lambda N^2} \|\alpha' - \alpha''\|^2. \end{aligned}$$

This proves the first desirable inequality in the lemma. By invoking the above inequality and using the fact  $D(\alpha) \leq D(\bar{\alpha})$  we get that

$$\begin{aligned} D(\bar{\alpha}) &\leq D(\alpha) + \langle g(\alpha), \bar{\alpha} - \alpha \rangle - \frac{\lambda N \mu + \sigma_{\min}^2(X, k)}{2\lambda N^2} \|\alpha - \bar{\alpha}\|^2 \\ &\leq D(\bar{\alpha}) + \langle g(\alpha), \bar{\alpha} - \alpha \rangle - \frac{\lambda N \mu + \sigma_{\min}^2(X, k)}{2\lambda N^2} \|\alpha - \bar{\alpha}\|^2, \end{aligned}$$

which leads to the second desired bound.  $\square$

The following lemma gives a simple expression of the gap for properly related primal-dual pairs.

**Lemma 4.** Given a dual variable  $\alpha \in \mathcal{F}^N$  and the related primal variable

$$w = \mathbf{H}_k \left( -\frac{1}{N\lambda} \sum_{i=1}^N \alpha_i x_i \right).$$

The primal-dual gap  $\epsilon_{PD}(w, \alpha)$  can be expressed as:

$$\epsilon_{PD}(w, \alpha) = \frac{1}{N} \sum_{i=1}^N (l_i(w^\top x_i) + l_i^*(\alpha_i) - \alpha_i w^\top x_i).$$

*Proof.* It is directly to know from the definitions of  $P(w)$  and  $D(\alpha)$  that

$$\begin{aligned} & P(w) - D(\alpha) \\ &= \frac{1}{N} \sum_{i=1}^N l_i(w^\top x_i) + \frac{\lambda}{2} \|w\|^2 - \left( \frac{1}{N} \sum_{i=1}^N (\alpha_i w^\top x_i - l_i^*(\alpha_i)) + \frac{\lambda}{2} \|w\|^2 \right) \\ &= \frac{1}{N} \sum_{i=1}^N (l_i(w^\top x_i) + l_i^*(\alpha_i) - \alpha_i w^\top x_i). \end{aligned}$$

This shows the desired expression.  $\square$

Based on Lemma 4, we can derive the following lemma which establishes a bound on the primal-dual gap.

**Lemma 5.** Consider a primal-dual pair  $(w, \alpha)$  satisfying

$$w = \mathbb{H}_k \left( -\frac{1}{N\lambda} \sum_{i=1}^N \alpha_i x_i \right).$$

Then the following inequality holds for any  $g(\alpha) \in \partial D(\alpha)$  and  $\beta \in [\partial l_1(w^\top x_1), \dots, \partial l_N(w^\top x_N)]$ :

$$P(w) - D(\alpha) \leq \langle g(\alpha), \beta - \alpha \rangle.$$

*Proof.* For any  $i \in [1, \dots, N]$ , from the maximizing argument property of convex conjugate we have

$$l_i(w^\top x_i) = w^\top x_i l_i'(w^\top x_i) - l_i^*(l_i'(w^\top x_i)),$$

and

$$l_i^*(\alpha_i) = \alpha_i l_i^{*'}(\alpha_i) - l_i(l_i^{*'}(\alpha_i)).$$

By summing both sides of above two equalities we get

$$\begin{aligned} & l_i(w^\top x_i) + l_i^*(\alpha_i) \\ &= w^\top x_i l_i'(w^\top x_i) + \alpha_i l_i^{*'}(\alpha_i) - (l_i(l_i^{*'}(\alpha_i)) + l_i^*(l_i'(w^\top x_i))) \\ &\stackrel{\zeta_1}{\leq} w^\top x_i l_i'(w^\top x_i) + \alpha_i l_i^{*'}(\alpha_i) - l_i^{*'}(\alpha_i) l_i'(w^\top x_i), \end{aligned} \tag{16}$$

where “ $\zeta_1$ ” follows from Fenchel-Young inequality. Therefore

$$\begin{aligned} & \langle g(\alpha), \beta - \alpha \rangle \\ &= \frac{1}{N} \sum_{i=1}^N (w^\top x_i - l_i^{*'}(\alpha_i)) (l_i'(w^\top x_i) - \alpha_i) \\ &= \frac{1}{N} \sum_{i=1}^N \left( w^\top x_i l_i'(w^\top x_i) - l_i^{*'}(\alpha_i) l_i'(w^\top x_i) - \alpha_i w^\top x_i + \alpha_i l_i^{*'}(\alpha_i) \right) \\ &\stackrel{\zeta_2}{\geq} \frac{1}{N} \sum_{i=1}^N (l_i(w^\top x_i) + \alpha_i l_i^*(\alpha_i) - w^\top x_i) \\ &\stackrel{\zeta_3}{=} P(w) - D(\alpha), \end{aligned}$$

where “ $\zeta_2$ ” follows from (16) and “ $\zeta_3$ ” follows from Lemma 4. This proves the desired bound.  $\square$

The following simple result is also needed in our iteration complexity analysis.

**Lemma 6.** For any  $\epsilon > 0$ ,

$$\frac{1}{t} + \frac{\ln t}{t} \leq \epsilon$$

holds when  $t \geq \max \left\{ \frac{3}{\epsilon} \ln \frac{3}{\epsilon}, 1 \right\}$ .

*Proof.* Obviously, the inequality  $\frac{1}{t} + \frac{\ln t}{t} \leq \epsilon$  holds for  $\epsilon \geq 1$ . When  $\epsilon < 1$ , it holds that  $\ln(\frac{3}{\epsilon}) \geq 1$ . Then the condition on  $t$  implies that  $\frac{1}{t} \leq \frac{\epsilon}{3}$ . Also, we have

$$\frac{\ln t}{t} \leq \frac{\ln(\frac{3}{\epsilon} \ln \frac{3}{\epsilon})}{\frac{3}{\epsilon} \ln \frac{3}{\epsilon}} \leq \frac{\ln(\frac{3}{\epsilon})^2}{\frac{3}{\epsilon} \ln \frac{3}{\epsilon}} = \frac{2\epsilon}{3},$$

where the first “ $\leq$ ” follows the fact that  $\ln t/t$  is decreasing when  $t \geq 1$  while the second “ $\leq$ ” follows  $\ln x < x$  for all  $x > 0$ . Therefore we have  $\frac{1}{t} + \frac{\ln t}{t} \leq \epsilon$ .  $\square$

We are now in the position to prove the main theorem.

*of Theorem 4. Part(a):* Let us consider  $g^{(t)} \in \partial D(\alpha^{(t)})$  with  $g_i^{(t)} = \frac{1}{N}(x_i^\top w^{(t)} - l_i^{*'}(\alpha_i^{(t)}))$ . From the expression of  $w^{(t)}$  we can verify that  $\|w^{(t)}\| \leq r/\lambda$ . Therefore we have

$$\|g^{(t)}\| \leq c_0 = \frac{r + \lambda\rho}{\lambda\sqrt{N}}.$$

Let  $h^{(t)} = \|\alpha^{(t)} - \bar{\alpha}\|$  and  $v^{(t)} = \langle g^{(t)}, \bar{\alpha} - \alpha^{(t)} \rangle$ . The concavity of  $D$  implies  $v^{(t)} \geq 0$ . From Lemma 3 we know that  $h^{(t)} \leq \sqrt{2\lambda N^2 v^{(t)} / (\lambda N\mu + \sigma_{\min}(X, k))}$ . Then

$$\begin{aligned} (h^{(t)})^2 &= \|\mathbb{P}_{\mathcal{FN}}(\alpha^{(t-1)} + \eta^{(t-1)}g^{(t-1)}) - \bar{\alpha}\|^2 \\ &\leq \|\alpha^{(t-1)} + \eta^{(t-1)}g^{(t-1)} - \bar{\alpha}\|^2 \\ &= (h^{(t-1)})^2 - 2\eta^{(t-1)}v^{(t-1)} + (\eta^{(t-1)})^2\|g^{(t-1)}\|^2 \\ &\leq (h^{(t-1)})^2 - \frac{\eta^{(t-1)}(\lambda N\mu + \sigma_{\min}(X, k))}{\lambda N^2}(h^{(t-1)})^2 + (\eta^{(t-1)})^2 c_0^2. \end{aligned}$$

Let  $\eta^{(t)} = \frac{\lambda N^2}{(\lambda N\mu + \sigma_{\min}(X, k))^{(t+1)}}$ . Then we obtain

$$(h^{(t)})^2 \leq \left(1 - \frac{1}{t}\right) (h^{(t-1)})^2 + \frac{\lambda^2 N^4 c_0^2}{(\lambda N\mu + \sigma_{\min}(X, k))^2 t^2}.$$

By recursively applying the above inequality we get

$$(h^{(t)})^2 \leq \frac{\lambda^2 N^4 c_0^2}{(\lambda N\mu + \sigma_{\min}(X, k))^2} \left(\frac{1}{t} + \frac{\ln t}{t}\right) = c_1 \left(\frac{1}{t} + \frac{\ln t}{t}\right).$$

This proves the desired bound in part(a).

**Part(b):** Let us consider  $\epsilon = \frac{\lambda N \bar{\epsilon}}{2\sigma_{\max}(X)}$ . From part(a) and Lemma 6 we obtain

$$\|\alpha^{(t)} - \bar{\alpha}\| \leq \epsilon$$

after  $t \geq t_0 = \frac{3c_1}{\epsilon^2} \ln \frac{3c_1}{\epsilon^2}$ . It follows from Lemma 2 that  $\text{supp}(w^{(t)}) = \text{supp}(\bar{w})$ .

Let  $\beta^{(t)} := [l_1'((w^{(t)})^\top x_1), \dots, l_N'((w^{(t)})^\top x_N)]$ . According to Lemma 5 we have

$$\begin{aligned} \epsilon_{PD}^{(t)} &= P(w^{(t)}) - D(\alpha^{(t)}) \\ &\leq \langle g^{(t)}, \beta^{(t)} - \alpha^{(t)} \rangle \\ &\leq \|g^{(t)}\| (\|\beta^{(t)} - \bar{\alpha}\| + \|\bar{\alpha} - \alpha^{(t)}\|). \end{aligned}$$

Since  $\bar{\epsilon} = \bar{w}_{\min} - \frac{1}{\lambda} \|P'(\bar{w})\|_\infty > 0$ , it follows from Theorem 2 that  $\bar{\alpha} = [l_1'(\bar{w}^\top x_1), \dots, l_N'(\bar{w}^\top x_N)]$ . Given that  $t \geq t_0$ , from the smoothness of  $l_i$  and Lemma 2 we get

$$\|\beta^{(t)} - \bar{\alpha}\| \leq \frac{1}{\mu} \|w^{(t)} - \bar{w}\| \leq \frac{\sigma_{\max}(X, k)}{\mu \lambda N} \|\alpha^{(t)} - \bar{\alpha}\|,$$

where in the first “ $\leq$ ” we have used  $\|x_i\| \leq 1$ . Therefore, the following is valid when  $t \geq t_0$ :

$$\begin{aligned} \epsilon_{PD}^{(t)} &\leq \|g^{(t)}\|(\|\beta^{(t)} - \bar{\alpha}\| + \|\bar{\alpha} - \alpha^{(t)}\|) \\ &\leq c_0 \left(1 + \frac{\sigma_{\max}(X, k)}{\mu\lambda N}\right) \|\alpha^{(t)} - \bar{\alpha}\|. \end{aligned}$$

Since  $t \geq t_1$ , from part(a) and Lemma 6 we get  $\|\alpha^{(t)} - \bar{\alpha}\| \leq \frac{\epsilon}{c_0(1 + \frac{\sigma_{\max}(X, k)}{\mu\lambda N})}$ , which according to the above inequality implies  $\epsilon_{PD}^{(t)} \leq \epsilon$ . This proves the desired bound.  $\square$

### A.6. Proof of Theorem 5

*Proof. Part(a):* Let us consider  $g^{(t)}$  with  $g_j^{(t)} = \frac{1}{N}(x_j^\top w^{(t)} - l_j^*(\alpha_i^{(t)}))$ . Let  $h^{(t)} = \|\alpha^{(t)} - \bar{\alpha}\|$  and  $v^{(t)} = \langle g^{(t)}, \bar{\alpha} - \alpha^{(t)} \rangle$ . The concavity of  $D$  implies  $v^{(t)} \geq 0$ . From Lemma 3 we know that  $h^{(t)} \leq \sqrt{2\lambda N^2 v^{(t)} / (\lambda N \mu + \sigma_{\min}(X, k))}$ . Let  $g_{B_i}^{(t)} := H_{B_i}^{(t)}(g^{(t)})$  and  $v_{B_i}^{(t)} := \langle g_{B_i}^{(t)}, \bar{\alpha} - \alpha^{(t)} \rangle$ . Then

$$\begin{aligned} (h^{(t)})^2 &= \|\mathbb{P}_{\mathcal{FN}}(\alpha^{(t-1)} + \eta^{(t-1)} g_{B_i}^{(t-1)}) - \bar{\alpha}\|^2 \\ &\leq \|\alpha^{(t-1)} + \eta^{(t-1)} g_{B_i}^{(t-1)} - \bar{\alpha}\|^2 \\ &= (h^{(t-1)})^2 - 2\eta^{(t-1)} v_{B_i}^{(t-1)} + (\eta^{(t-1)})^2 \|g_{B_i}^{(t-1)}\|^2. \end{aligned}$$

By taking conditional expectation (with respect to uniform random block selection, conditioned on  $\alpha^{(t-1)}$ ) on both sides of the above inequality we get

$$\begin{aligned} &\mathbb{E}[(h^{(t)})^2 \mid \alpha^{(t-1)}] \\ &\leq (h^{(t-1)})^2 - \frac{1}{m} \sum_{i=1}^m 2\eta^{(t-1)} v_{B_i}^{(t-1)} + \frac{1}{m} \sum_{i=1}^m (\eta^{(t-1)})^2 \|g_{B_i}^{(t-1)}\|^2 \\ &= (h^{(t-1)})^2 - \frac{2\eta^{(t-1)}}{m} v^{(t-1)} + \frac{(\eta^{(t-1)})^2}{m} \|g^{(t-1)}\|^2 \\ &\leq (h^{(t-1)})^2 - \frac{\eta^{(t-1)}(\lambda N \mu + \sigma_{\min}(X, k))}{\lambda m N^2} (h^{(t-1)})^2 + \frac{(\eta^{(t-1)})^2}{m} c_0^2. \end{aligned}$$

Let  $\eta^{(t)} = \frac{\lambda m N^2}{(\lambda N \mu + \sigma_{\min}(X, k))(t+1)}$ . Then we obtain

$$\mathbb{E}[(h^{(t)})^2 \mid \alpha^{(t-1)}] \leq \left(1 - \frac{1}{t}\right) (h^{(t-1)})^2 + \frac{\lambda^2 m N^4 c_0^2}{(\lambda N \mu + \sigma_{\min}(X, k))^2 t^2}.$$

By taking expectation on both sides of the above over  $\alpha^{(t-1)}$ , we further get

$$\mathbb{E}[(h^{(t)})^2] \leq \left(1 - \frac{1}{t}\right) \mathbb{E}[(h^{(t-1)})^2] + \frac{\lambda^2 m N^4 c_0^2}{(\lambda N \mu + \sigma_{\min}(X, k))^2 t^2}.$$

This recursive inequality leads to

$$\mathbb{E}[(h^{(t)})^2] \leq \frac{\lambda^2 m N^4 c_0^2}{(\lambda N \mu + \sigma_{\min}(X, k))^2} \left(\frac{1}{t} + \frac{\ln t}{t}\right) = c_2 \left(\frac{1}{t} + \frac{\ln t}{t}\right).$$

This proves the desired bound in part(a).

**Part(b):** Let us consider  $\epsilon = \frac{\lambda N \bar{\epsilon}}{2\sigma_{\max}(X)}$ . From part(a) and Lemma 6 we obtain

$$\mathbb{E}[\|\alpha^{(t)} - \bar{\alpha}\|] \leq \delta \epsilon$$

after  $t \geq t_2 = \frac{3c_2}{\delta^2 \epsilon^2} \ln \frac{3c_2}{\delta^2 \epsilon^2}$ . Then from Markov inequality we know that  $\|\alpha^{(t)} - \bar{\alpha}\| \leq \mathbb{E}[\|\alpha^{(t)} - \bar{\alpha}\|] / \delta \leq \epsilon$  holds with probability at least  $1 - \delta$ . Lemma 2 shows that  $\|\alpha^{(t)} - \bar{\alpha}\| \leq \epsilon$  implies  $\text{supp}(w^{(t)}) = \text{supp}(\bar{w})$ . Therefore when  $t \geq t_2$ , the event  $\text{supp}(w^{(t)}) = \text{supp}(\bar{w})$  occurs with probability at least  $1 - \delta$ .

---

### Dual Iterative Hard Thresholding

---

Similar to the proof arguments of Theorem 4(b) we can further show that when  $t \geq 4t_2$ , with probability at least  $1 - \delta/2$

$$\|\alpha^{(t)} - \bar{\alpha}\| \leq \frac{\lambda N \bar{\epsilon}}{2\sigma_{\max}(X)},$$

which then leads to

$$\epsilon_{PD}^{(t)} \leq c_0 \left( 1 + \frac{\sigma_{\max}(X, k)}{\mu \lambda N} \right) \|\alpha^{(t)} - \bar{\alpha}\|.$$

Since  $t \geq t_3$ , from the arguments in part(a) and Lemma 6 we get that  $\|\alpha^{(t)} - \bar{\alpha}\| \leq \frac{\epsilon}{c_0 \left( 1 + \frac{\sigma_{\max}(X, k)}{\mu \lambda N} \right)}$  holds with probability at least  $1 - \delta/2$ . Let us consider the following events:

- $\mathcal{A}$ : the event of  $\epsilon_{PD}^{(t)} \leq \epsilon$ ;
- $\mathcal{B}$ : the event of  $\|\alpha^{(t)} - \bar{\alpha}\| \leq \frac{\lambda N \bar{\epsilon}}{2\sigma_{\max}(X)}$ ;
- $\mathcal{C}$ : the event of  $\|\alpha^{(t)} - \bar{\alpha}\| \leq \frac{\epsilon}{c_0 \left( 1 + \frac{\sigma_{\max}(X, k)}{\mu \lambda N} \right)}$ .

When  $t \geq \max\{4t_2, t_3\}$ , we have the following holds:

$$\mathbb{P}(\mathcal{A}) \geq \mathbb{P}(\mathcal{A} \mid \mathcal{B})\mathbb{P}(\mathcal{B}) \geq \mathbb{P}(\mathcal{C} \mid \mathcal{B})\mathbb{P}(\mathcal{B}) \geq (1 - \delta/2)^2 \geq 1 - \delta.$$

This proves the desired bound. □
